# Supplementary material
Source: Springer Nature journal article supplement (https://www.springermedizin.de/resource/supplementary/12889_2012_4554_MOESM4_ESM.pdf/9493432)
Supplement: MOESM4 [file 9493432]

Additional file 4. Crude prevalence of risk factors for noncommunicable diseases among adults aged 18 or higher living in 48 low- and middle-income countries, World Health Survey 2002-04

|       |                             | Current daily smokers |       |      | Low-fruit/vegetable consumers <sup>a</sup> |       |      | Physically inactive people <sup>b</sup> |       |      | Heavy episodic alcohol drinkers <sup>c</sup> |       |      |
|-------|-----------------------------|-----------------------|-------|------|--------------------------------------------|-------|------|-----------------------------------------|-------|------|----------------------------------------------|-------|------|
|       |                             | Estimate              | 95%CI |      | Estimate                                   | 95%CI |      | Estimate                                | 95%CI |      | Estimate                                     | 95%CI |      |
| Men   | Middle-income country group | <b>29.0</b>           | 28.0  | 29.9 | <b>73.7</b>                                | 72.1  | 75.2 | <b>13.0</b>                             | 12.1  | 14.0 | <b>13.6</b>                                  | 12.7  | 14.4 |
|       | Low-income country group    | <b>29.7</b>           | 28.3  | 31.0 | <b>74.8</b>                                | 73.0  | 76.7 | <b>6.3</b>                              | 5.5   | 7.1  | <b>3.5</b>                                   | 3.1   | 4.0  |
| Women | Middle-income country group | <b>8.5</b>            | 7.9   | 9.0  | <b>74.0</b>                                | 72.6  | 75.5 | <b>14.1</b>                             | 13.2  | 15.0 | <b>3.3</b>                                   | 2.9   | 3.6  |
|       | Low-income country group    | <b>4.7</b>            | 4.2   | 5.3  | <b>74.7</b>                                | 72.9  | 76.5 | <b>14.1</b>                             | 13.0  | 15.1 | <b>1.0</b>                                   | 0.8   | 1.2  |

Abbreviations: 95% CI, 95% Confidence Interval

All numbers are in percentage

<sup>a</sup> No data were available for Mexico

<sup>b</sup> No data were available for Morocco and Latvia

<sup>c</sup> Mauritania; and Bosnia-Herzegovina, Comoros, Mauritania and Pakistan were excluded from males and females datasets, respectively
